# Supplementary material for: Association of Prenatal Depression With New Cardiovascular Disease Within 24 Months Postpartum
Source: PubMed Central journal article supplement — J Am Heart Assoc. 2023 Apr 19;12(9):e028133. doi: 10.1161/JAHA.122.028133 (PMC10227220; doi:10.1161/jaha.122.028133), 2023-04-19
Supplement: JAH3-12-e028133-s001.pdf [file JAH3-12-e028133-s001.pdf]

# **SUPPLEMENTAL MATERIAL**

**Table S1. ICD9/10 Codes for Prenatal Depression and Cardiovascular Diagnoses\***

|                                       | <b>ICD-9</b>                                                                                                                                                                                                        | <b>ICD-10</b>                                                                                                                                                                                                                                                                                                                                                                                                                                                                                                                                                                                                                                                               |
|---------------------------------------|---------------------------------------------------------------------------------------------------------------------------------------------------------------------------------------------------------------------|-----------------------------------------------------------------------------------------------------------------------------------------------------------------------------------------------------------------------------------------------------------------------------------------------------------------------------------------------------------------------------------------------------------------------------------------------------------------------------------------------------------------------------------------------------------------------------------------------------------------------------------------------------------------------------|
| <b>Prenatal depression</b>            | 684, 296.20, 296.21, 296.22, 296.23, 296.24, 296.25, 296.30, 296.31, 296.32, 296.33, 296.34, 296.35, 296.82, 298.0, 300.4, 301.12, 301.13, 309.0, 309.1, 309.28, 311                                                | F06.31, F06.32, F32.0, F32.1, F32.2, F32.3, F32.4, F32.8, F32.81, F32.89, F32.9, F33.0, F33.1, F33.2, F33.3, F33.41, F33.8, F33.9, F34.1, F43.21, F43.23, O90.6, O99.34                                                                                                                                                                                                                                                                                                                                                                                                                                                                                                     |
| <b>Heart failure</b>                  | 428.0, 428.1, 428.20, 428.21, 428.22, 428.23, 428.30, 428.31, 428.32, 428.33, 428.40, 428.41, 428.42, 428.43, 428.9, 402.01, 402.11, 402.91, 404.01, 404.03, 404.11, 404.13, 404.91, 404.93, 402.01, 402.11, 402.91 | I09.81, I11.0, I13.0, I13.2, I50.1, I50.20, I50.21, I50.22, I50.23, I50.30, I50.31, I50.32, I50.33, I50.40, I50.41, I50.42, I50.43, I50.9, I50.810, I50.811, I50.812, I50.813, I50.814, I50.82, I50.83, I50.84, I50.8                                                                                                                                                                                                                                                                                                                                                                                                                                                       |
| <b>Ischemic heart disease</b>         | 410.x, 411.1, 411.8                                                                                                                                                                                                 | I20.0, I20.1, I20.8, I20.9, I21.01, I21.02, I21.09, I21.11, I21.19, I21.21, I21.29, I21.3, I21.4, I21.9, I21.A1, I21.A9, I22.0, I22.1, I22.2, I22.8, I22.9, I23.0, I23.1, I23.2, I23.3, I23.4, I23.5, I23.6, I23.7, I23.8, I24.0, I24.1, I24.8, I24.9, I25.10, I25.110, I25.111, I25.118, I25.119, I25.2, I25.3, I25.41, I25.42, I25.5, I25.6, I25.700, I25.701, I25.708, I25.709, I25.710, I25.711, I25.718, I25.719, I25.720, I25.721, I25.728, I25.729, I25.730, I25.731, I25.738, I25.739, I25.750, I25.751, I25.758, I25.759, I25.760, I25.761, I25.768, I25.769, I25.790, I25.791, I25.798, I25.799, I25.810, I25.811, I25.812, I25.82, I25.83, I25.84, I25.89, I25.9 |
| <b>Cerebrovascular disease/stroke</b> | 430, 431, 432.x, 433.x, 434.x, 435.x, 436, 437.x, 6715.x, 6740.x, 997.02                                                                                                                                            | G45.0, G45.1, G45.2, G45.3, G45.8, G45.9, G46.0, G46.1, G46.2, G46.3, G46.4, G46.5, G46.6, G46.7, G46.8, G97.31, G97.32, I60.00, I60.01, I60.02, I60.10, I60.11, I60.12, I60.20, I60.21, I60.22, I60.30, I60.31, I60.32, I60.4, I60.50, I60.51, I60.52, I60.6, I60.7, I60.8, I60.9, I61.0                                                                                                                                                                                                                                                                                                                                                                                   |

|                                  |                                       |                                                                                                                                                                                                                                                                                                                                                                                                                                                                                                                                                                                                                                                                                                                                                                                                                                                                                                                                                                                                                                                                                                                                                                                                                                                                                                                                                                                                                 |
|----------------------------------|---------------------------------------|-----------------------------------------------------------------------------------------------------------------------------------------------------------------------------------------------------------------------------------------------------------------------------------------------------------------------------------------------------------------------------------------------------------------------------------------------------------------------------------------------------------------------------------------------------------------------------------------------------------------------------------------------------------------------------------------------------------------------------------------------------------------------------------------------------------------------------------------------------------------------------------------------------------------------------------------------------------------------------------------------------------------------------------------------------------------------------------------------------------------------------------------------------------------------------------------------------------------------------------------------------------------------------------------------------------------------------------------------------------------------------------------------------------------|
|                                  |                                       | ,I61.1 , I61.2 , I61.3 , I61.4 , I61.5 , I61.6 ,<br>I61.8 , I61.9 , I63.00 ,I63.011 , I63.012 ,<br>I63.013 , I63.019 , I63.02 , I63.031 , I63.032 ,<br>I63.039 , I63.09 , I63.10 , I63.111 , I63.112 ,<br>I63.119 , I63.12 , I63.131 , I63.132 , I63.133 ,<br>I63.139 , I63.19 , I63.20 , I63.211 , I63.212 ,<br>I63.213 , I63.219 , I63.22 , I63.231 , I63.232 ,<br>I63.233 , I63.239 , I63.29 , I63.30 , I63.311 ,<br>I63.312 , I63.313 , I63.319 , I63.321 , I63.322<br>, I63.323 , I63.329 , I63.331 , I63.332 ,<br>I63.333 , I63.339 , I63.341 , I63.342 , I63.343<br>, I63.349 , I63.39 , I63.40 , I63.411 , I63.412 ,<br>I63.413 , I63.419 , I63.421 , I63.422 , I63.423<br>, I63.429 , I63.431 , I63.432 , I63.433 ,<br>I63.439 , I63.441 , I63.442 , I63.443 , I63.449<br>, I63.49 , I63.50 , I63.511 , I63.512 , I63.513 ,<br>I63.519 , I63.521 , I63.522 , I63.523 , I63.529<br>, I63.531 , I63.532 , I63.533 , I63.539 ,<br>I63.541 , I63.542 , I63.543 , I63.549 , I63.59 ,<br>I63.6 , I63.8 , I63.9 , I66.01 , I66.02 , I66.03 ,<br>I66.09 , I66.11 , I66.12 , I66.13 , I66.19 ,<br>I66.21 , I66.22 , I66.23 , I66.29 , I66.3 , I66.8 ,<br>I66.9 , I67.841 , I67.848 , I97.810 , I97.811,<br>I97.820 , I97.821 , I60.2 , I63.033 , I63.113 ,<br>I62.9 , I65.1 , I65.29 , I65.09 , I6781 , I67.2 ,<br>I67.82 , I67.89 , I67.4 , I67.1 , I67.7 , I67.5 ,<br>I67.6 , I67.9 , I67.848 , O87.3 , O99.4 |
| <b>Arrhythmia/cardiac arrest</b> | 427.31, 427.32, 427.41, 427.42, 427.5 | I49.01 , I40.92 , I46.9 , I48.0 , I48.1 , I48.2 ,<br>I48.91 , I48.4 , I48.92                                                                                                                                                                                                                                                                                                                                                                                                                                                                                                                                                                                                                                                                                                                                                                                                                                                                                                                                                                                                                                                                                                                                                                                                                                                                                                                                    |
| <b>Cardiomyopathy</b>            | 674.5x, 425.x                         | O90.3 , I42.1 , I42.2 , I42.4 , I42.5 , I42.6 ,<br>I42.7 , I42.8 , I42.9 , I43                                                                                                                                                                                                                                                                                                                                                                                                                                                                                                                                                                                                                                                                                                                                                                                                                                                                                                                                                                                                                                                                                                                                                                                                                                                                                                                                  |
| <b>Hypertension</b>              | 401.x, 402.x, 403.x, 404.x, 405.x     | I10 , I11 , I12 , I13 , I15 , I16                                                                                                                                                                                                                                                                                                                                                                                                                                                                                                                                                                                                                                                                                                                                                                                                                                                                                                                                                                                                                                                                                                                                                                                                                                                                                                                                                                               |

\*Codes ending in .x refer to the stem codes.

**Table S2. Characteristics of pregnancies by different insurance coverage windows**

|                                   | Study Population |       | <i>At least 12 months prior to delivery through at least 12 months postpartum coverage</i> |       |       |       |
|-----------------------------------|------------------|-------|--------------------------------------------------------------------------------------------|-------|-------|-------|
|                                   |                  |       | NO                                                                                         |       | YES   |       |
|                                   | N                | %     | N                                                                                          | %     | N     | %     |
| Total                             | 119422           | 100.0 | 50669                                                                                      | 100.0 | 68753 | 100.0 |
| Delivery year                     |                  |       |                                                                                            |       |       |       |
| 2007                              | 10792            | 9.0   | 4372                                                                                       | 8.6   | 6420  | 9.3   |
| 2008                              | 10727            | 9.0   | 4164                                                                                       | 8.2   | 6563  | 9.6   |
| 2009                              | 10601            | 8.9   | 3901                                                                                       | 7.7   | 6700  | 9.8   |
| 2010                              | 10200            | 8.5   | 3583                                                                                       | 7.1   | 6617  | 9.6   |
| 2011                              | 10238            | 8.6   | 3444                                                                                       | 6.8   | 6794  | 9.9   |
| 2012                              | 10367            | 8.7   | 3950                                                                                       | 7.8   | 6417  | 9.3   |
| 2013                              | 9763             | 8.2   | 4769                                                                                       | 9.4   | 4994  | 7.3   |
| 2014                              | 9087             | 7.6   | 4573                                                                                       | 9.0   | 4514  | 6.6   |
| 2015                              | 9014             | 7.6   | 4669                                                                                       | 9.2   | 4345  | 6.3   |
| 2016                              | 7463             | 6.3   | 3723                                                                                       | 7.4   | 3740  | 5.4   |
| 2017                              | 7324             | 6.1   | 3571                                                                                       | 7.1   | 3753  | 5.5   |
| 2018                              | 7105             | 6.0   | 3280                                                                                       | 6.5   | 3825  | 5.6   |
| 2019                              | 6741             | 5.6   | 2670                                                                                       | 5.3   | 4071  | 5.9   |
| Maternal age                      |                  |       |                                                                                            |       |       |       |
| Missing                           | 50               | 0.0   | 14                                                                                         | 0.0   | 36    | 0.1   |
| 15-19                             | 7392             | 6.2   | 3305                                                                                       | 6.5   | 4087  | 5.9   |
| 20-24                             | 28161            | 23.6  | 14545                                                                                      | 28.7  | 13616 | 19.8  |
| 25-29                             | 35761            | 30.0  | 15599                                                                                      | 30.8  | 20162 | 29.3  |
| 30-34                             | 30257            | 25.3  | 11188                                                                                      | 22.1  | 19069 | 27.7  |
| 35+                               | 17801            | 14.9  | 6018                                                                                       | 11.9  | 11783 | 17.1  |
| Any stillbirth codes for delivery |                  |       |                                                                                            |       |       |       |
| No                                | 118796           | 99.5  | 50400                                                                                      | 99.5  | 68396 | 99.5  |
| Yes                               | 626              | 0.5   | 269                                                                                        | 0.5   | 357   | 0.5   |
| Any C-section codes for delivery  |                  |       |                                                                                            |       |       |       |
| No                                | 84970            | 71.2  | 36614                                                                                      | 72.3  | 48356 | 70.3  |
| Yes                               | 34452            | 28.9  | 14055                                                                                      | 27.7  | 20397 | 29.7  |
| Preterm delivery                  |                  |       |                                                                                            |       |       |       |
| No                                | 110450           | 92.5  | 47208                                                                                      | 93.2  | 63242 | 92.0  |
| Yes                               | 8972             | 7.5   | 3461                                                                                       | 6.8   | 5511  | 8.0   |
| Pregnancy number in this dataset  |                  |       |                                                                                            |       |       |       |

|                                                |        |       |       |       |       |      |
|------------------------------------------------|--------|-------|-------|-------|-------|------|
| 1                                              | 79992  | 67.0  | 37176 | 73.4  | 42816 | 62.3 |
| 2                                              | 30642  | 25.7  | 10280 | 20.3  | 20362 | 29.6 |
| 3                                              | 6799   | 5.7   | 2471  | 4.9   | 4328  | 6.3  |
| 4                                              | 1523   | 1.3   | 561   | 1.1   | 962   | 1.4  |
| 5                                              | 349    | 0.3   | 137   | 0.3   | 212   | 0.3  |
| 6                                              | 83     | 0.1   | 33    | 0.1   | 50    | 0.1  |
| 7                                              | 31     | 0.0   | 10    | 0.0   | 21    | 0.0  |
| 8                                              | *      |       | *     |       | *     |      |
| Health insurance coverage                      |        |       |       |       |       |      |
| Medicaid                                       | 66014  | 55.3  | 32505 | 64.2  | 33509 | 48.7 |
| Commercial                                     | 53120  | 44.5  | 18140 | 35.8  | 34980 | 50.9 |
| Medicare                                       | 288    | 0.2   | 24    | 0.1   | 264   | 0.4  |
| Last month of continuous insurance postpartum  |        |       |       |       |       |      |
| <6 months                                      | 23179  | 19.4  | 23179 | 45.8  | 0     | 0.0  |
| 6-11 months                                    | 10476  | 8.8   | 10476 | 20.7  | 0     | 0.0  |
| 12-23 months                                   | 16625  | 13.9  | 4341  | 8.6   | 12284 | 17.9 |
| 24+ months                                     | 69142  | 57.9  | 12673 | 25.0  | 56469 | 82.1 |
| Any preexisting depression                     |        |       |       |       |       |      |
| No                                             | 99185  | 83.1  | 44893 | 88.6  | 54292 | 79.0 |
| Yes                                            | 20237  | 17.0  | 5776  | 11.4  | 14461 | 21.0 |
| Any preexisting hypertension                   |        |       |       |       |       |      |
| No                                             | 110761 | 92.8  | 47532 | 93.8  | 63229 | 92.0 |
| Yes                                            | 8661   | 7.3   | 3137  | 6.2   | 5524  | 8.0  |
| Any preexisting diabetes                       |        |       |       |       |       |      |
| No                                             | 116049 | 97.2  | 49537 | 97.8  | 66512 | 96.7 |
| Yes                                            | 3373   | 2.8   | 1132  | 2.2   | 2241  | 3.3  |
| Any heart failure diagnosis prior to pregnancy |        |       |       |       |       |      |
| No                                             | 119368 | 100.0 | 50659 | 100.0 | 68709 | 99.9 |
| Yes                                            | 54     | 0.1   | 10    | 0.0   | 44    | 0.1  |
| Any heart disease diagnosis prior to pregnancy |        |       |       |       |       |      |
| No                                             | 119364 | 100.0 | 50652 | 100.0 | 68712 | 99.9 |
| Yes                                            | 58     | 0.1   | 17    | 0.0   | 41    | 0.1  |
| Any stroke diagnosis prior to pregnancy        |        |       |       |       |       |      |
| No                                             | 119231 | 99.8  | 50617 | 99.9  | 68614 | 99.8 |
| Yes                                            | 191    | 0.2   | 52    | 0.1   | 139   | 0.2  |

|                                                 |        |      |       |       |       |      |
|-------------------------------------------------|--------|------|-------|-------|-------|------|
| Any arrhythmia diagnosis prior to pregnancy     |        |      |       |       |       |      |
| No                                              | 119344 | 99.9 | 50646 | 100.0 | 68698 | 99.9 |
| Yes                                             | 78     | 0.1  | 23    | 0.1   | 55    | 0.1  |
| Any cardiomyopathy diagnosis prior to pregnancy |        |      |       |       |       |      |
| No                                              | 119345 | 99.9 | 50647 | 100.0 | 68698 | 99.9 |
| Yes                                             | 77     | 0.1  | 22    | 0.0   | 55    | 0.1  |
| Prenatal depression                             |        |      |       |       |       |      |
| No                                              | 93585  | 78.4 | 40915 | 80.8  | 52670 | 76.6 |
| Yes                                             | 25837  | 21.6 | 9754  | 19.3  | 16083 | 23.4 |
| Hypertensive disorders of pregnancy             |        |      |       |       |       |      |
| No                                              | 104785 | 87.7 | 44494 | 87.8  | 60291 | 87.7 |
| Yes                                             | 14637  | 12.3 | 6175  | 12.2  | 8462  | 12.3 |
| Gestational diabetes                            |        |      |       |       |       |      |
| No                                              | 109321 | 91.5 | 46718 | 92.2  | 62603 | 91.1 |
| Yes                                             | 10101  | 8.5  | 3951  | 7.8   | 6150  | 9.0  |
| Any anxiety disorder prior to pregnancy         |        |      |       |       |       |      |
| No                                              | 103936 | 87.0 | 46173 | 91.1  | 57763 | 84.0 |
| Yes                                             | 15486  | 13.0 | 4496  | 8.9   | 10990 | 16.0 |
| Any anxiety diagnosis during pregnancy          |        |      |       |       |       |      |
| No                                              | 103968 | 87.1 | 44773 | 88.4  | 59195 | 86.1 |
| Yes                                             | 15454  | 12.9 | 5896  | 11.6  | 9558  | 13.9 |

\*Suppressed cell count per data use agreement with Maine Health Data Organization  
Abbreviations: PTSD=posttraumatic stress disorder

**Table S3. Risk of cardiovascular disease diagnosis in the first 24 months' postpartum for people with prenatal depression, deliveries in Maine 2007-2019**

|                                                       | Unadjusted HR (95% CI) | aHR (95% CI)*      | aHR (95% CI)**     |
|-------------------------------------------------------|------------------------|--------------------|--------------------|
| <b>Heart Failure</b>                                  |                        |                    |                    |
| No prenatal depression                                | Reference              | Reference          | Reference          |
| Prenatal depression                                   | 2.11 ( 1.59, 2.81)     | 1.40 ( 0.99, 1.98) | 1.48 ( 1.01, 2.16) |
| <b>Ischemic Heart Disease</b>                         |                        |                    |                    |
| No prenatal depression                                | Reference              | Reference          | Reference          |
| Prenatal depression                                   | 3.22 ( 2.24, 4.65)     | 1.83 ( 1.20, 2.80) | 1.47 ( 0.96, 2.24) |
| <b>Cerebrovascular Disease/Stroke</b>                 |                        |                    |                    |
| No prenatal depression                                | Reference              | Reference          | Reference          |
| Prenatal depression                                   | 1.71 ( 1.40, 2.09)     | 1.27 ( 1.00, 1.60) | 1.12 ( 0.86, 1.47) |
| <b>Arrhythmia/Cardiac Arrest</b>                      |                        |                    |                    |
| No prenatal depression                                | Reference              | Reference          | Reference          |
| Prenatal depression                                   | 2.08 ( 1.50, 2.90)     | 1.60 ( 1.10, 2.31) | 1.54 ( 1.06, 2.23) |
| <b>Cardiomyopathy</b>                                 |                        |                    |                    |
| No prenatal depression                                | Reference              | Reference          | Reference          |
| Prenatal depression                                   | 1.92 ( 1.45, 2.55)     | 1.61 ( 1.15, 2.24) | 1.54 ( 1.08, 2.19) |
| <b>Chronic Hypertension (43+ days after delivery)</b> |                        |                    |                    |
| No prenatal depression                                | Reference              | Reference          | Reference          |
| Prenatal depression                                   | 1.66 ( 1.50, 1.85)     | 1.32 ( 1.17, 1.50) | 1.26 ( 1.10, 1.44) |
| <b>Severe Cardiac Disease</b>                         |                        |                    |                    |
| No prenatal depression                                | Reference              | Reference          | Reference          |
| Prenatal depression                                   | 1.86 ( 1.60, 2.17)     | 1.39 ( 1.16, 1.67) | 1.28 ( 1.05, 1.57) |

Data source: Maine Health Data Organization's All Payer Claims Database

aHR=adjusted hazard ratio; CI=confidence interval; CVD= cardiovascular disease; HR= hazard ratio

\*Adjusted for maternal age at time of delivery, pre-pregnancy depression, pre-pregnancy hypertension, pre-pregnancy diabetes, obesity, smoking, nulliparity, pregnancy number in dataset, year of delivery, Medicaid coverage during pregnancy, county-level measures, ZIP-code level measures, hypertensive disorders of pregnancy, and gestational diabetes.

\*\*\*Additionally adjusted for anxiety during pregnancy.
